# Supplementary material
Source: publisher site journal article supplement (https://www.spandidos-publications.com/6242/downloadSupplementary)
Supplement: Supplementary file 1 [file downloadSupplementary]

## Sheet: Sheet1
Table SVIII. Results of GESA analysis
High-risk group												Low-risk group
Table: Gene sets enriched in phenotype h (220 samples) [plain text format]												Table: Gene sets enriched in phenotype l (259 samples) [plain text format]
	GS	GS DETAILS	SIZE	ES	NES	NOM p-val	FDR q-val	FWER p-val	RANK AT MAX	LEADING EDGE			GS	GS DETAILS	SIZE	ES	NES	NOM p-val	FDR q-val	FWER p-val	RANK AT MAX	LEADING EDGE
	follow link to MSigDB												follow link to MSigDB
1	KEGG_FOCAL_ADHESION	Details ...	199	0.62	2.19	0	0	0	9652	tags=55%, list=17%, signal=67%		1	KEGG_OXIDATIVE_PHOSPHORYLATION	Details ...	132	-0.57	-1.58	0.079	0.564	0.635	8014	tags=47%, list=14%, signal=55%
2	KEGG_REGULATION_OF_ACTIN_CYTOSKELETON	Details ...	213	0.57	2.18	0	0.001	0.001	8720	tags=45%, list=16%, signal=53%		2	KEGG_RIBOSOME	Details ...	88	-0.79	-1.55	0.087	0.356	0.697	8658	tags=86%, list=16%, signal=102%
3	KEGG_N_GLYCAN_BIOSYNTHESIS	Details ...	46	0.75	2.13	0	0.001	0.002	7071	tags=67%, list=13%, signal=77%		3	KEGG_PARKINSONS_DISEASE	Details ...	130	-0.53	-1.52	0.098	0.276	0.74	9385	tags=50%, list=17%, signal=60%
4	KEGG_SMALL_CELL_LUNG_CANCER	Details ...	84	0.64	2.11	0	0.001	0.003	6156	tags=49%, list=11%, signal=55%		4	KEGG_CARDIAC_MUSCLE_CONTRACTION	Details ...	79	-0.5	-1.5	0.078	0.237	0.777	7996	tags=49%, list=14%, signal=58%
5	KEGG_GLYCOSAMINOGLYCAN_DEGRADATION	Details ...	21	0.77	2.07	0	0.002	0.008	4900	tags=57%, list=9%, signal=63%		5	KEGG_BUTANOATE_METABOLISM	Details ...	34	-0.4	-1.26	0.198	0.615	0.962	4979	tags=26%, list=9%, signal=29%
6	KEGG_JAK_STAT_SIGNALING_PATHWAY	Details ...	155	0.59	2.07	0	0.002	0.008	10521	tags=46%, list=19%, signal=56%		6	KEGG_AMYOTROPHIC_LATERAL_SCLEROSIS_ALS	Details ...	53	-0.35	-1.21	0.217	0.619	0.983	5385	tags=38%, list=10%, signal=42%
7	KEGG_PATHWAYS_IN_CANCER	Details ...	325	0.52	2.07	0	0.002	0.008	7830	tags=40%, list=14%, signal=47%		7	KEGG_LONG_TERM_POTENTIATION	Details ...	70	-0.38	-1.19	0.291	0.57	0.988	9429	tags=49%, list=17%, signal=58%
8	KEGG_PROSTATE_CANCER	Details ...	89	0.57	2.06	0	0.002	0.009	6558	tags=39%, list=12%, signal=45%		8	KEGG_ALZHEIMERS_DISEASE	Details ...	166	-0.36	-1.18	0.281	0.51	0.99	8014	tags=41%, list=14%, signal=48%
9	KEGG_ECM_RECEPTOR_INTERACTION	Details ...	84	0.71	2.05	0	0.002	0.011	7389	tags=63%, list=13%, signal=73%		9	KEGG_PROPANOATE_METABOLISM	Details ...	33	-0.38	-1.17	0.288	0.486	0.991	3751	tags=30%, list=7%, signal=32%
10	KEGG_PANCREATIC_CANCER	Details ...	70	0.59	2.05	0	0.002	0.011	7791	tags=49%, list=14%, signal=56%		10	KEGG_HUNTINGTONS_DISEASE	Details ...	182	-0.34	-1.16	0.299	0.452	0.992	8083	tags=35%, list=15%, signal=41%
11	KEGG_SYSTEMIC_LUPUS_ERYTHEMATOSUS	Details ...	135	0.67	2.05	0	0.001	0.011	11961	tags=66%, list=22%, signal=84%		11	KEGG_GLYOXYLATE_AND_DICARBOXYLATE_METABOLISM	Details ...	16	-0.39	-1.15	0.284	0.423	0.995	9145	tags=38%, list=17%, signal=45%
12	KEGG_AMINO_SUGAR_AND_NUCLEOTIDE_SUGAR_METABOLISM	Details ...	44	0.65	2.03	0	0.001	0.011	7921	tags=50%, list=14%, signal=58%		12	KEGG_PYRUVATE_METABOLISM	Details ...	40	-0.33	-1.1	0.327	0.449	0.996	2842	tags=20%, list=5%, signal=21%
13	KEGG_VIRAL_MYOCARDITIS	Details ...	68	0.67	2	0	0.002	0.014	6347	tags=60%, list=11%, signal=68%		13	KEGG_TERPENOID_BACKBONE_BIOSYNTHESIS	Details ...	15	-0.44	-1.06	0.397	0.483	0.996	3304	tags=33%, list=6%, signal=35%
14	KEGG_CELL_CYCLE	Details ...	125	0.69	2	0.002	0.002	0.014	8384	tags=53%, list=15%, signal=62%		14	KEGG_ALANINE_ASPARTATE_AND_GLUTAMATE_METABOLISM	Details ...	32	-0.32	-1.06	0.38	0.452	0.996	4871	tags=25%, list=9%, signal=27%
15	KEGG_APOPTOSIS	Details ...	87	0.58	2	0	0.002	0.014	6356	tags=49%, list=11%, signal=56%		15	KEGG_LONG_TERM_DEPRESSION	Details ...	70	-0.27	-0.98	0.451	0.523	1	6752	tags=27%, list=12%, signal=31%
16	KEGG_ARRHYTHMOGENIC_RIGHT_VENTRICULAR_CARDIOMYOPATHY_ARVC	Details ...	74	0.59	1.98	0	0.002	0.018	8595	tags=53%, list=16%, signal=62%		16	KEGG_TASTE_TRANSDUCTION	Details ...	51	-0.28	-0.95	0.536	0.531	1	9054	tags=29%, list=16%, signal=35%
17	KEGG_CELL_ADHESION_MOLECULES_CAMS	Details ...	131	0.62	1.98	0	0.002	0.02	8409	tags=54%, list=15%, signal=64%		17	KEGG_BIOSYNTHESIS_OF_UNSATURATED_FATTY_ACIDS	Details ...	22	-0.26	-0.76	0.744	0.781	1	6142	tags=27%, list=11%, signal=31%
18	KEGG_LEUKOCYTE_TRANSENDOTHELIAL_MIGRATION	Details ...	116	0.59	1.97	0	0.002	0.021	11685	tags=59%, list=21%, signal=74%		18	KEGG_OLFACTORY_TRANSDUCTION	Details ...	386	-0.11	-0.45	1	0.99	1	13571	tags=20%, list=25%, signal=26%
19	KEGG_GLUTATHIONE_METABOLISM	Details ...	49	0.61	1.94	0	0.005	0.046	4357	tags=35%, list=8%, signal=38%
20	KEGG_PURINE_METABOLISM	Details ...	159	0.5	1.94	0	0.005	0.052	11145	tags=47%, list=20%, signal=58%
21	KEGG_P53_SIGNALING_PATHWAY	Details ...	68	0.61	1.92	0.002	0.006	0.056	7830	tags=54%, list=14%, signal=63%
22	KEGG_NICOTINATE_AND_NICOTINAMIDE_METABOLISM	Details ...	24	0.64	1.92	0	0.006	0.06	9049	tags=63%, list=16%, signal=75%
23	KEGG_AUTOIMMUNE_THYROID_DISEASE	Details ...	50	0.72	1.92	0	0.006	0.062	9364	tags=58%, list=17%, signal=70%
24	KEGG_LYSOSOME	Details ...	121	0.58	1.91	0.002	0.007	0.069	9520	tags=56%, list=17%, signal=68%
25	KEGG_BLADDER_CANCER	Details ...	42	0.57	1.9	0.002	0.008	0.082	10639	tags=55%, list=19%, signal=68%
26	KEGG_OTHER_GLYCAN_DEGRADATION	Details ...	16	0.78	1.9	0.002	0.008	0.082	8251	tags=69%, list=15%, signal=81%
27	KEGG_ABC_TRANSPORTERS	Details ...	44	0.58	1.89	0	0.008	0.087	11341	tags=55%, list=21%, signal=69%
28	KEGG_CYTOKINE_CYTOKINE_RECEPTOR_INTERACTION	Details ...	264	0.58	1.88	0	0.008	0.094	11158	tags=48%, list=20%, signal=60%
29	KEGG_ADHERENS_JUNCTION	Details ...	73	0.53	1.87	0	0.01	0.116	8509	tags=41%, list=15%, signal=49%
30	KEGG_T_CELL_RECEPTOR_SIGNALING_PATHWAY	Details ...	108	0.54	1.86	0.006	0.011	0.127	8781	tags=48%, list=16%, signal=57%
31	KEGG_PATHOGENIC_ESCHERICHIA_COLI_INFECTION	Details ...	56	0.59	1.86	0.006	0.011	0.131	12865	tags=61%, list=23%, signal=79%
32	KEGG_CYTOSOLIC_DNA_SENSING_PATHWAY	Details ...	55	0.56	1.85	0.004	0.011	0.132	11067	tags=45%, list=20%, signal=57%
33	KEGG_NATURAL_KILLER_CELL_MEDIATED_CYTOTOXICITY	Details ...	132	0.54	1.84	0.004	0.012	0.142	10010	tags=48%, list=18%, signal=59%
34	KEGG_GLYCOSYLPHOSPHATIDYLINOSITOL_GPI_ANCHOR_BIOSYNTHESIS	Details ...	25	0.65	1.84	0	0.012	0.142	8877	tags=56%, list=16%, signal=67%
35	KEGG_ANTIGEN_PROCESSING_AND_PRESENTATION	Details ...	81	0.64	1.84	0.012	0.012	0.144	10583	tags=57%, list=19%, signal=70%
36	KEGG_PRIMARY_IMMUNODEFICIENCY	Details ...	35	0.71	1.83	0.006	0.014	0.169	10614	tags=71%, list=19%, signal=88%
37	KEGG_HYPERTROPHIC_CARDIOMYOPATHY_HCM	Details ...	83	0.53	1.83	0	0.014	0.178	5736	tags=35%, list=10%, signal=39%
38	KEGG_RENIN_ANGIOTENSIN_SYSTEM	Details ...	17	0.67	1.82	0.006	0.015	0.188	3695	tags=41%, list=7%, signal=44%
39	KEGG_NON_SMALL_CELL_LUNG_CANCER	Details ...	54	0.52	1.81	0.002	0.017	0.211	9801	tags=46%, list=18%, signal=56%
40	KEGG_GALACTOSE_METABOLISM	Details ...	25	0.62	1.81	0	0.016	0.211	7921	tags=52%, list=14%, signal=61%
41	KEGG_DNA_REPLICATION	Details ...	36	0.82	1.8	0.008	0.017	0.215	5141	tags=72%, list=9%, signal=80%
42	KEGG_INSULIN_SIGNALING_PATHWAY	Details ...	136	0.45	1.79	0.002	0.019	0.232	12850	tags=50%, list=23%, signal=65%
43	KEGG_PYRIMIDINE_METABOLISM	Details ...	98	0.55	1.79	0.017	0.018	0.233	11192	tags=51%, list=20%, signal=64%
44	KEGG_PANTOTHENATE_AND_COA_BIOSYNTHESIS	Details ...	16	0.66	1.79	0.002	0.018	0.24	7115	tags=50%, list=13%, signal=57%
45	KEGG_INTESTINAL_IMMUNE_NETWORK_FOR_IGA_PRODUCTION	Details ...	46	0.71	1.79	0.008	0.018	0.241	11158	tags=72%, list=20%, signal=90%
46	KEGG_MISMATCH_REPAIR	Details ...	23	0.8	1.78	0.002	0.019	0.247	10501	tags=87%, list=19%, signal=107%
47	KEGG_FC_GAMMA_R_MEDIATED_PHAGOCYTOSIS	Details ...	96	0.51	1.78	0.014	0.018	0.247	9799	tags=46%, list=18%, signal=56%
48	KEGG_MELANOMA	Details ...	71	0.49	1.78	0.002	0.019	0.254	8720	tags=38%, list=16%, signal=45%
49	KEGG_PEROXISOME	Details ...	78	0.49	1.77	0.005	0.02	0.273	12781	tags=50%, list=23%, signal=65%
50	KEGG_SPHINGOLIPID_METABOLISM	Details ...	39	0.53	1.77	0.008	0.02	0.273	11347	tags=49%, list=21%, signal=61%
51	KEGG_TOLL_LIKE_RECEPTOR_SIGNALING_PATHWAY		102	0.52	1.76	0.014	0.021	0.293	11067	tags=49%, list=20%, signal=61%
52	KEGG_RIG_I_LIKE_RECEPTOR_SIGNALING_PATHWAY		71	0.48	1.76	0.006	0.021	0.294	8385	tags=41%, list=15%, signal=48%
53	KEGG_RENAL_CELL_CARCINOMA		70	0.48	1.76	0.002	0.021	0.295	12275	tags=47%, list=22%, signal=61%
54	KEGG_NUCLEOTIDE_EXCISION_REPAIR		44	0.64	1.76	0.018	0.021	0.296	9459	tags=57%, list=17%, signal=68%
55	KEGG_STARCH_AND_SUCROSE_METABOLISM		51	0.58	1.75	0	0.022	0.306	8360	tags=39%, list=15%, signal=46%
56	KEGG_HOMOLOGOUS_RECOMBINATION		28	0.74	1.75	0.006	0.021	0.306	5988	tags=54%, list=11%, signal=60%
57	KEGG_DILATED_CARDIOMYOPATHY		90	0.5	1.74	0.01	0.023	0.329	5748	tags=33%, list=10%, signal=37%
58	KEGG_GRAFT_VERSUS_HOST_DISEASE		37	0.77	1.74	0.012	0.024	0.342	11067	tags=89%, list=20%, signal=111%
59	KEGG_CHRONIC_MYELOID_LEUKEMIA		73	0.51	1.73	0.01	0.025	0.355	12249	tags=49%, list=22%, signal=63%
60	KEGG_COLORECTAL_CANCER		62	0.5	1.73	0.01	0.025	0.357	6416	tags=37%, list=12%, signal=42%
61	KEGG_O_GLYCAN_BIOSYNTHESIS		30	0.58	1.72	0.006	0.027	0.375	7083	tags=47%, list=13%, signal=53%
62	KEGG_PENTOSE_PHOSPHATE_PATHWAY		27	0.54	1.71	0.008	0.028	0.389	7652	tags=44%, list=14%, signal=52%
63	KEGG_HEMATOPOIETIC_CELL_LINEAGE		85	0.6	1.71	0.01	0.027	0.39	13539	tags=59%, list=24%, signal=78%
64	KEGG_GLYCOSAMINOGLYCAN_BIOSYNTHESIS_HEPARAN_SULFATE		26	0.57	1.71	0.008	0.027	0.394	7992	tags=38%, list=14%, signal=45%
65	KEGG_B_CELL_RECEPTOR_SIGNALING_PATHWAY		75	0.5	1.69	0.032	0.032	0.435	13243	tags=56%, list=24%, signal=74%
66	KEGG_COMPLEMENT_AND_COAGULATION_CASCADES		69	0.62	1.69	0.017	0.032	0.439	12778	tags=61%, list=23%, signal=79%
67	KEGG_GLIOMA		65	0.48	1.69	0.006	0.032	0.44	10013	tags=43%, list=18%, signal=53%
68	KEGG_ALLOGRAFT_REJECTION		35	0.76	1.69	0.022	0.032	0.441	10010	tags=83%, list=18%, signal=101%
69	KEGG_LEISHMANIA_INFECTION		70	0.61	1.69	0.048	0.032	0.445	11158	tags=66%, list=20%, signal=82%
70	KEGG_CHEMOKINE_SIGNALING_PATHWAY		188	0.47	1.68	0.021	0.032	0.448	9451	tags=38%, list=17%, signal=46%
71	KEGG_ACUTE_MYELOID_LEUKEMIA		57	0.49	1.67	0.018	0.034	0.472	9257	tags=39%, list=17%, signal=46%
72	KEGG_PROGESTERONE_MEDIATED_OOCYTE_MATURATION		85	0.48	1.66	0.019	0.037	0.498	7396	tags=35%, list=13%, signal=41%
73	KEGG_PROTEIN_EXPORT		24	0.63	1.66	0.023	0.037	0.502	7751	tags=38%, list=14%, signal=44%
74	KEGG_VEGF_SIGNALING_PATHWAY		76	0.43	1.66	0.006	0.037	0.508	5976	tags=33%, list=11%, signal=37%
75	KEGG_AXON_GUIDANCE		129	0.46	1.65	0.018	0.039	0.522	9509	tags=43%, list=17%, signal=52%
76	KEGG_ETHER_LIPID_METABOLISM		33	0.49	1.63	0.008	0.045	0.556	10773	tags=45%, list=19%, signal=56%
77	KEGG_BASE_EXCISION_REPAIR		35	0.63	1.62	0.049	0.05	0.587	4359	tags=46%, list=8%, signal=50%
78	KEGG_TGF_BETA_SIGNALING_PATHWAY		86	0.44	1.61	0.012	0.051	0.599	11158	tags=42%, list=20%, signal=52%
79	KEGG_TIGHT_JUNCTION		131	0.4	1.61	0.004	0.052	0.602	13606	tags=43%, list=25%, signal=57%
80	KEGG_ASTHMA		28	0.67	1.6	0.056	0.053	0.61	6063	tags=54%, list=11%, signal=60%
81	KEGG_GLYCOSPHINGOLIPID_BIOSYNTHESIS_GANGLIO_SERIES		15	0.6	1.6	0.031	0.053	0.616	6540	tags=47%, list=12%, signal=53%
82	KEGG_UBIQUITIN_MEDIATED_PROTEOLYSIS		135	0.47	1.59	0.052	0.056	0.628	12246	tags=41%, list=22%, signal=53%
83	KEGG_TYPE_I_DIABETES_MELLITUS		41	0.63	1.59	0.063	0.057	0.635	10450	tags=66%, list=19%, signal=81%
84	KEGG_TYROSINE_METABOLISM		42	0.48	1.58	0.02	0.06	0.655	12063	tags=43%, list=22%, signal=55%
85	KEGG_GLYCOLYSIS_GLUCONEOGENESIS		61	0.48	1.57	0.032	0.06	0.665	8267	tags=41%, list=15%, signal=48%
86	KEGG_ENDOMETRIAL_CANCER		52	0.46	1.57	0.025	0.06	0.667	13243	tags=48%, list=24%, signal=63%
87	KEGG_MAPK_SIGNALING_PATHWAY		267	0.39	1.57	0.027	0.061	0.673	7850	tags=29%, list=14%, signal=34%
88	KEGG_OOCYTE_MEIOSIS		113	0.45	1.57	0.039	0.06	0.675	7396	tags=32%, list=13%, signal=37%
89	KEGG_NEUROTROPHIN_SIGNALING_PATHWAY		126	0.41	1.56	0.018	0.063	0.684	7203	tags=31%, list=13%, signal=36%
90	KEGG_GAP_JUNCTION		90	0.43	1.55	0.042	0.069	0.72	7396	tags=30%, list=13%, signal=35%
91	KEGG_NOTCH_SIGNALING_PATHWAY		47	0.5	1.52	0.046	0.079	0.751	9377	tags=45%, list=17%, signal=54%
92	KEGG_ADIPOCYTOKINE_SIGNALING_PATHWAY		66	0.41	1.5	0.033	0.088	0.77	6541	tags=29%, list=12%, signal=33%
93	KEGG_VASCULAR_SMOOTH_MUSCLE_CONTRACTION		115	0.4	1.5	0.034	0.088	0.775	10773	tags=37%, list=19%, signal=45%
94	KEGG_TRYPTOPHAN_METABOLISM		40	0.46	1.5	0.033	0.088	0.777	9658	tags=40%, list=17%, signal=48%
95	KEGG_GLYCOSAMINOGLYCAN_BIOSYNTHESIS_KERATAN_SULFATE		15	0.6	1.5	0.073	0.087	0.777	8179	tags=67%, list=15%, signal=78%
96	KEGG_ENDOCYTOSIS		181	0.37	1.49	0.032	0.09	0.782	9224	tags=31%, list=17%, signal=38%
97	KEGG_SNARE_INTERACTIONS_IN_VESICULAR_TRANSPORT		38	0.43	1.49	0.044	0.09	0.783	5996	tags=34%, list=11%, signal=38%
98	KEGG_ONE_CARBON_POOL_BY_FOLATE		17	0.56	1.46	0.076	0.105	0.827	8361	tags=47%, list=15%, signal=55%
99	KEGG_CYSTEINE_AND_METHIONINE_METABOLISM		34	0.43	1.46	0.044	0.105	0.827	9486	tags=38%, list=17%, signal=46%
100	KEGG_AMINOACYL_TRNA_BIOSYNTHESIS		41	0.54	1.46	0.102	0.105	0.829	13489	tags=59%, list=24%, signal=77%
101	KEGG_RIBOFLAVIN_METABOLISM		16	0.5	1.46	0.068	0.104	0.829	10650	tags=50%, list=19%, signal=62%
102	KEGG_GLYCEROPHOSPHOLIPID_METABOLISM		76	0.36	1.46	0.037	0.103	0.829	13087	tags=43%, list=24%, signal=57%
103	KEGG_GLYCOSAMINOGLYCAN_BIOSYNTHESIS_CHONDROITIN_SULFATE		22	0.49	1.46	0.093	0.103	0.83	11326	tags=45%, list=20%, signal=57%
104	KEGG_LYSINE_DEGRADATION		44	0.47	1.44	0.078	0.113	0.857	11919	tags=45%, list=22%, signal=58%
105	KEGG_BASAL_CELL_CARCINOMA		55	0.47	1.44	0.063	0.114	0.862	6508	tags=33%, list=12%, signal=37%
106	KEGG_PPAR_SIGNALING_PATHWAY		69	0.41	1.43	0.052	0.115	0.865	9615	tags=36%, list=17%, signal=44%
107	KEGG_MATURITY_ONSET_DIABETES_OF_THE_YOUNG		25	0.48	1.42	0.095	0.122	0.878	17297	tags=60%, list=31%, signal=87%
108	KEGG_PRION_DISEASES		35	0.43	1.42	0.063	0.121	0.878	11922	tags=43%, list=22%, signal=55%
109	KEGG_GLYCINE_SERINE_AND_THREONINE_METABOLISM		31	0.44	1.41	0.065	0.122	0.883	5588	tags=29%, list=10%, signal=32%
110	KEGG_NOD_LIKE_RECEPTOR_SIGNALING_PATHWAY		62	0.44	1.4	0.113	0.132	0.9	12298	tags=53%, list=22%, signal=68%
111	KEGG_PRIMARY_BILE_ACID_BIOSYNTHESIS		16	0.53	1.39	0.109	0.137	0.908	10452	tags=56%, list=19%, signal=69%
112	KEGG_THYROID_CANCER		29	0.43	1.39	0.098	0.136	0.91	5684	tags=31%, list=10%, signal=35%
113	KEGG_GNRH_SIGNALING_PATHWAY		101	0.37	1.38	0.11	0.14	0.911	10773	tags=36%, list=19%, signal=44%
114	KEGG_EPITHELIAL_CELL_SIGNALING_IN_HELICOBACTER_PYLORI_INFECTION		68	0.39	1.38	0.106	0.14	0.912	7257	tags=32%, list=13%, signal=37%
115	KEGG_RNA_DEGRADATION		59	0.49	1.38	0.146	0.142	0.919	13372	tags=51%, list=24%, signal=67%
116	KEGG_VIBRIO_CHOLERAE_INFECTION		54	0.4	1.36	0.137	0.153	0.935	12349	tags=44%, list=22%, signal=57%
117	KEGG_PROTEASOME		46	0.53	1.34	0.223	0.164	0.949	13377	tags=50%, list=24%, signal=66%
118	KEGG_ERBB_SIGNALING_PATHWAY		87	0.38	1.34	0.134	0.165	0.952	9652	tags=34%, list=17%, signal=42%
119	KEGG_VASOPRESSIN_REGULATED_WATER_REABSORPTION		44	0.38	1.34	0.13	0.166	0.953	11494	tags=41%, list=21%, signal=52%
120	KEGG_MELANOGENESIS		101	0.36	1.33	0.115	0.169	0.954	6508	tags=23%, list=12%, signal=26%
121	KEGG_FC_EPSILON_RI_SIGNALING_PATHWAY		79	0.35	1.33	0.111	0.168	0.954	10773	tags=34%, list=19%, signal=42%
122	KEGG_HEDGEHOG_SIGNALING_PATHWAY		56	0.41	1.33	0.107	0.17	0.956	6508	tags=29%, list=12%, signal=32%
123	KEGG_PHENYLALANINE_METABOLISM		18	0.49	1.33	0.126	0.168	0.956	8672	tags=44%, list=16%, signal=53%
124	KEGG_STEROID_BIOSYNTHESIS		17	0.54	1.31	0.212	0.181	0.962	14168	tags=59%, list=26%, signal=79%
125	KEGG_DORSO_VENTRAL_AXIS_FORMATION		24	0.42	1.27	0.152	0.208	0.976	9377	tags=38%, list=17%, signal=45%
126	KEGG_FATTY_ACID_METABOLISM		42	0.39	1.26	0.174	0.216	0.977	8495	tags=36%, list=15%, signal=42%
127	KEGG_ARACHIDONIC_ACID_METABOLISM		58	0.34	1.23	0.179	0.244	0.987	10773	tags=31%, list=19%, signal=38%
128	KEGG_ARGININE_AND_PROLINE_METABOLISM		54	0.36	1.22	0.199	0.251	0.987	9348	tags=33%, list=17%, signal=40%
129	KEGG_BETA_ALANINE_METABOLISM		22	0.38	1.21	0.166	0.255	0.987	3247	tags=23%, list=6%, signal=24%
130	KEGG_DRUG_METABOLISM_CYTOCHROME_P450		71	0.39	1.21	0.219	0.261	0.989	8360	tags=24%, list=15%, signal=28%
131	KEGG_DRUG_METABOLISM_OTHER_ENZYMES		51	0.39	1.2	0.208	0.263	0.989	8360	tags=25%, list=15%, signal=30%
132	KEGG_TYPE_II_DIABETES_MELLITUS		47	0.37	1.2	0.238	0.264	0.99	6950	tags=32%, list=13%, signal=36%
133	KEGG_HISTIDINE_METABOLISM		29	0.35	1.17	0.235	0.292	0.992	9226	tags=31%, list=17%, signal=37%
134	KEGG_WNT_SIGNALING_PATHWAY		151	0.29	1.13	0.27	0.34	0.995	8637	tags=26%, list=16%, signal=31%
135	KEGG_REGULATION_OF_AUTOPHAGY		35	0.34	1.12	0.285	0.343	0.995	10010	tags=23%, list=18%, signal=28%
136	KEGG_RNA_POLYMERASE		29	0.41	1.11	0.368	0.356	0.996	8183	tags=34%, list=15%, signal=40%
137	KEGG_NITROGEN_METABOLISM		23	0.37	1.1	0.32	0.356	0.996	8998	tags=30%, list=16%, signal=36%
138	KEGG_SPLICEOSOME		127	0.4	1.1	0.412	0.354	0.996	10411	tags=38%, list=19%, signal=46%
139	KEGG_MTOR_SIGNALING_PATHWAY		52	0.31	1.1	0.318	0.358	0.997	7487	tags=25%, list=14%, signal=29%
140	KEGG_GLYCEROLIPID_METABOLISM		49	0.28	1.09	0.296	0.364	0.997	3903	tags=14%, list=7%, signal=15%
141	KEGG_RETINOL_METABOLISM		64	0.36	1.09	0.361	0.361	0.997	14929	tags=36%, list=27%, signal=49%
142	KEGG_ALDOSTERONE_REGULATED_SODIUM_REABSORPTION		42	0.34	1.08	0.363	0.373	0.997	16040	tags=48%, list=29%, signal=67%
143	KEGG_INOSITOL_PHOSPHATE_METABOLISM		54	0.31	1.07	0.376	0.38	0.998	11444	tags=39%, list=21%, signal=49%
144	KEGG_SELENOAMINO_ACID_METABOLISM		26	0.35	1.07	0.354	0.377	0.998	9226	tags=31%, list=17%, signal=37%
145	KEGG_VALINE_LEUCINE_AND_ISOLEUCINE_DEGRADATION		44	0.34	1.06	0.372	0.392	0.998	11637	tags=36%, list=21%, signal=46%
146	KEGG_ALPHA_LINOLENIC_ACID_METABOLISM		19	0.34	1.06	0.391	0.389	0.998	12472	tags=37%, list=23%, signal=48%
147	KEGG_PORPHYRIN_AND_CHLOROPHYLL_METABOLISM		41	0.35	1.04	0.416	0.402	0.998	18722	tags=54%, list=34%, signal=81%
148	KEGG_PENTOSE_AND_GLUCURONATE_INTERCONVERSIONS		28	0.39	1.04	0.428	0.405	0.998	17156	tags=50%, list=31%, signal=72%
149	KEGG_PROXIMAL_TUBULE_BICARBONATE_RECLAMATION		23	0.37	1.03	0.419	0.414	0.998	9036	tags=39%, list=16%, signal=47%
150	KEGG_FRUCTOSE_AND_MANNOSE_METABOLISM		34	0.3	1.03	0.404	0.414	0.998	7530	tags=24%, list=14%, signal=27%
151	KEGG_PHOSPHATIDYLINOSITOL_SIGNALING_SYSTEM		76	0.3	1.01	0.418	0.435	0.999	11444	tags=36%, list=21%, signal=45%
152	KEGG_CITRATE_CYCLE_TCA_CYCLE		31	0.37	1	0.435	0.436	0.999	8405	tags=29%, list=15%, signal=34%
153	KEGG_STEROID_HORMONE_BIOSYNTHESIS		55	0.31	1	0.43	0.435	0.999	19023	tags=51%, list=34%, signal=78%
154	KEGG_BASAL_TRANSCRIPTION_FACTORS		35	0.34	0.98	0.486	0.457	0.999	9464	tags=29%, list=17%, signal=34%
155	KEGG_CALCIUM_SIGNALING_PATHWAY		178	0.29	0.97	0.473	0.466	0.999	11327	tags=31%, list=20%, signal=39%
156	KEGG_LINOLEIC_ACID_METABOLISM		29	0.31	0.97	0.503	0.471	0.999	16719	tags=45%, list=30%, signal=64%
157	KEGG_GLYCOSPHINGOLIPID_BIOSYNTHESIS_LACTO_AND_NEOLACTO_SERIES		26	0.29	0.92	0.569	0.527	1	11070	tags=35%, list=20%, signal=43%
158	KEGG_METABOLISM_OF_XENOBIOTICS_BY_CYTOCHROME_P450		69	0.3	0.92	0.581	0.532	1	8360	tags=20%, list=15%, signal=24%
159	KEGG_NEUROACTIVE_LIGAND_RECEPTOR_INTERACTION		270	0.24	0.85	0.634	0.622	1	14379	tags=35%, list=26%, signal=47%
160	KEGG_ASCORBATE_AND_ALDARATE_METABOLISM		25	0.33	0.82	0.725	0.67	1	17156	tags=48%, list=31%, signal=70%
GESA, Gene Set Enrichment Analysis; KEGG, Kyoto Encyclopedia of Genes and Genomes.
